# Supplementary material for: Disease Expression and Familial Transmission of Fuchs Endothelial Corneal Dystrophy With and Without CTG18.1 Expansion
Source: PubMed Central journal article supplement — Invest Ophthalmol Vis Sci. 2021 Jan 14;62(1):17. doi: 10.1167/iovs.62.1.17 (PMC7814354; doi:10.1167/iovs.62.1.17), 2021-01-14
Supplement: iovs-62-1-17_s001.pdf [file iovs-62-1-17_s001.pdf]

**Supplemental Table:** Main findings of each arm of the study.

| Arm of Study                                                                                   | Main Findings                                                                                                                                                                                                                                                                                                                                                                                                                                                                                                                             |
|------------------------------------------------------------------------------------------------|-------------------------------------------------------------------------------------------------------------------------------------------------------------------------------------------------------------------------------------------------------------------------------------------------------------------------------------------------------------------------------------------------------------------------------------------------------------------------------------------------------------------------------------------|
| <b>Unrelated cohort (N=781)</b>                                                                | <ul style="list-style-type: none"> <li>• 424 (77.7%) FECD cases were CTG18.1exp+</li> <li>• 18 (7.7%) controls were CTG18.1exp+</li> <li>• A diagnosis of FECD associated with CTG18.1 expansion status (<math>p=2.48 \times 10^{-44}</math>) and CTG18.1<sub>L</sub> (<math>p=3.38 \times 10^{-46}</math>)</li> <li>• CTG18.1exp+ status associated with FECD severity (<math>p=5.62 \times 10^{-7}</math>)</li> <li>• FECD severity associated with CTG18.1<sub>L</sub> among FECD cases (<math>p=8.8 \times 10^{-4}</math>)</li> </ul> |
| <b>Family cohort (N=112 families; 331 subjects)</b>                                            | <ul style="list-style-type: none"> <li>• 146 (67.0%) FECD cases were CTG18.1exp+</li> <li>• 27 (23.9%) controls were CTG18.1exp+</li> <li>• A diagnosis of FECD associated with CTG18.1 expansion status (<math>p=6.23 \times 10^{-13}</math>) and log<sub>10</sub> (CTG18.1<sub>L</sub>) (<math>p=8.0 \times 10^{-6}</math>)</li> <li>• Penetrance of FECD associated with CTG18.1exp+ was 85.4%</li> </ul>                                                                                                                              |
| <b>CTG18.1exp+ families (N=87 families; 249 subjects)</b>                                      | <ul style="list-style-type: none"> <li>• Penetrance of FECD increased by age quartile (range: 44.4-86.2%)</li> <li>• No sex difference in penetrance of FECD (<math>p=0.08</math>)</li> </ul>                                                                                                                                                                                                                                                                                                                                             |
| <b>Parent-offspring relationships from CTG18.1exp+ families (N=62 families; 106 offspring)</b> | <ul style="list-style-type: none"> <li>• CTG18.1 expansion transmitted to offspring in 62 (58.5%) parent-offspring relationships</li> <li>• 41 (66.1%) CTG18.1exp+ offspring exhibited the FECD phenotype</li> <li>• No significant difference in transmission of the expanded repeat by parental sex (<math>p=0.62</math>)</li> <li>• 8 (18.2%) offspring who did not inherit the CTG18.1 expansion exhibited the FECD phenotype</li> </ul>                                                                                              |
| <b>Intergenerational instability among CTG18.1exp+ offspring (N=62)</b>                        | <ul style="list-style-type: none"> <li>• 8 (12.9%) had change in CTG18.1<sub>L</sub> <math>\geq 50</math> repeats</li> <li>• 3 (4.8%) expansions of 1,900 repeats</li> <li>• 5 (8.1%) contractions (range: -900 to -1,900 repeats)</li> </ul>                                                                                                                                                                                                                                                                                             |
